# Supplementary material for: Description of Four Novel Species in Pleosporales Associated with Coffee in Yunnan, China
Source: MDPI journal article supplement (doi:10.3390/jof8101113), 2022-10-21
Supplement: s1 [file s1]

## Article

# Description of Four Novel Species in *Pleosporales* Associated with Coffee in Yunnan, China

Li Lu <sup>1,2,3</sup>, Samantha C. Karunarathna <sup>1</sup>, Dong-Qin Dai <sup>1</sup>, Yin-Ru Xiong <sup>2,3,4</sup>, Nakarin Suwannarach <sup>5</sup>, Steven L. Stephenson <sup>6</sup>, Abdallah M. Elgorban <sup>7</sup>, Salim Al-Rejaie <sup>8</sup>, Ruvishika S. Jayawardena <sup>2</sup> and Saowaluck Tibpromma <sup>1,\*</sup>

- <sup>1</sup> Center for Yunnan Plateau Biological Resources Protection and Utilization, Yunnan Engineering Research College of Biological Re-source and Food Engineering, Qujing Normal University, Qujing 655011, China
- <sup>2</sup> Center of Excellence in Fungal Research, Mae Fah Luang University, Chiang Rai 57100, Thailand
- <sup>3</sup> School of Science, Mae Fah Luang University, Chiang Rai 57100, Thailand
- <sup>4</sup> Innovative Institute for Plant Health, Zhong Kai University, Guangzhou 510550, China
- <sup>5</sup> Research Center of Microbial Diversity and Sustainable Utilization, Faculty of Science, Chiang Mai University, Chiang Mai 50200, Thailand
- <sup>6</sup> Department of Biological Sciences, University of Arkansas, Fayetteville, AR 72701, USA
- <sup>7</sup> Department of Botany and Microbiology, College of Science, King Saud University, Riyadh P.O. Box 145111, Saudi Arabia
- <sup>8</sup> Department of Pharmacology & Toxicology, College of Pharmacy, King Saud University, Riyadh P.O. Box 145111, Saudi Arabia
- \* Correspondence: saowaluckfai@gmail.com

**Table S1.** Taxa names, collection numbers, and corresponding GenBank accession numbers of the taxa used in the phylogenetic analyses. Newly generated sequences in this study are indicated in bold. The type species are noted with <sup>T</sup> after the species name, while NA indicates the unavailability of data.

| Taxa names                                        | Collection number | GenBank Accession Numbers |                 |                 |                 |                 |
|---------------------------------------------------|-------------------|---------------------------|-----------------|-----------------|-----------------|-----------------|
|                                                   |                   | ITS                       | LSU             | <i>rpb2</i>     | SSU             | <i>tef1-α</i>   |
| <i>Alloconiothyrium aptrootii</i>                 | CBS 980.95        | JX496121                  | JX496234        | NA              | NA              | NA              |
| <i>Alloconiothyrium aptrootii</i> <sup>T</sup>    | CBS 981.95        | JX496122                  | JX496235        | NA              | NA              | NA              |
| <i>Alloconiothyrium camelliae</i>                 | NTUCC 17-032-1    | MT112294                  | MT071270        | NA              | MT071221        | MT232967        |
| <i>Alloconiothyrium camelliae</i>                 | NTUCC 17-032-2    | MT112295                  | MT071271        | NA              | MT071222        | MT232965        |
| <i>Alloconiothyrium camelliae</i>                 | NTUCC 17-032-3    | MT112296                  | MT071272        | NA              | MT071223        | MT232966        |
| <i>Austropleospora keteleeriae</i>                | ZHKUCC 22-0208    | <b>OP297801</b>           | <b>OP297771</b> | <b>NA</b>       | <b>OP297785</b> | <b>OP321570</b> |
| <i>Austropleospora keteleeriae</i>                | ZHKUCC 22-0209    | <b>OP297802</b>           | <b>OP297772</b> | <b>NA</b>       | <b>OP297786</b> | <b>OP321571</b> |
| <i>Austropleospora keteleeriae</i> <sup>T</sup>   | MFLUCC 18-1551    | MK347802                  | MK348021        | NA              | MK347910        | MK360045        |
| <i>Austropleospora ochracea</i> <sup>T</sup>      | KUMCC 20-0020     | MT799859                  | MT799860        | NA              | MT808321        | MT872714        |
| <i>Bimuria novae-zelandiae</i> <sup>T</sup>       | CBS 107.79        | MH861181                  | AY016356        | DQ470917        | NA              | DQ471087        |
| <i>Bimuria omanensis</i>                          | SQUCC 15280       | MT274326                  | MT271820        | NA              | NA              | MT279046        |
| <i>Deniquelata barringtoniae</i>                  | MFLUCC 11-0257    | KM213997                  | KM214000        | NA              | KM214003        | NA              |
| <i>Deniquelata barringtoniae</i>                  | MFLUCC 11-0422    | JX254654                  | JX254655        | NA              | JX254656        | NA              |
| <i>Deniquelata hypolithi</i> <sup>T</sup>         | CBS:146988        | MZ064429                  | MZ064486        | MZ078201        | NA              | MZ078250        |
| <i>Deniquelata quercina</i>                       | ABRIICC 10068     | MH316153                  | MH316157        | NA              | MH316155        | NA              |
| <i>Deniquelata quercina</i>                       | ABRIICC 10111     | MH316154                  | MH316158        | NA              | MH316156        | NA              |
| <i>Deniquelata vittalii</i>                       | NFCCI 4249        | MF406218                  | MF182395        | NA              | MF622059        | NA              |
| <i>Deniquelata yunnanensis</i> <sup>T</sup>       | ZHKUCC 22-0198    | <b>OP297803</b>           | <b>OP297773</b> | <b>OP321562</b> | <b>OP297787</b> | <b>OP321572</b> |
| <i>Deniquelata yunnanensis</i>                    | ZHKUCC 22-0199    | <b>OP297804</b>           | <b>OP297774</b> | <b>OP321563</b> | <b>OP297788</b> | <b>OP321573</b> |
| <i>Didymocrea sadasivanii</i>                     | CBS 438.65        | MH870299                  | DQ384103        | NA              | DQ384066        | NA              |
| <i>Didymosphaeria rubi-ulmifolii</i> <sup>T</sup> | MFLUCC 14-0023    | NA                        | KJ436586        | NA              | KJ436588        | NA              |

|                                                   |                       |                 |                 |           |                 |                 |
|---------------------------------------------------|-----------------------|-----------------|-----------------|-----------|-----------------|-----------------|
| <i>Didymosphaeria rubi-ulmifolii</i>              | MFLUCC 14-0024        | NA              | KJ436585        | NA        | KJ436587        | NA              |
| <i>Didymosphaeria rubi-ulmifolii</i> <sup>T</sup> | CBS 100299            | NA              | JX496124        | NA        | AY642523        | NA              |
| <i>Gregarithecium curvisporum</i>                 | KT922                 | AB809644        | AB807547        | NA        | AB797257        | AB808523        |
| <i>Gregarithecium</i> sp.                         | MFLUCC 13-0853        | KX364281        | KX364282        | NA        | KX364283        | NA              |
| <i>Kalmusia ebuli</i> <sup>T</sup>                | CBS 123120            | KF796674        | JN644073        | NA        | JN851818        | NA              |
| <i>Kalmusia italica</i> <sup>T</sup>              | MFLUCC 13-0066        | KP325440        | KP325441        | NA        | KP325442        | NA              |
| <i>Kalmusia longisporum</i>                       | CBS 582.83            | JX496097        | JX496210        | NA        | NA              | NA              |
| <i>Kalmusia longisporum</i>                       | CBS 824.84            | JX496115        | JX496228        | NA        | NA              | NA              |
| <i>Kalmusia sarothamni</i>                        | CBS 116474            | KF796676        | KF796673        | NA        | KF796672        | NA              |
| <i>Karstenula rhodostoma</i>                      | CBS 690.94            | NA              | GU301821        | NA        | GU296154        | GU349067        |
| <i>Karstenula rhodostoma</i>                      | CBS 691.94            | LC014559        | AB807531        | NA        | AB797241        | AB808506        |
| <i>Laburnicola centaureae</i> <sup>T</sup>        | MFLUCC 13-0601        | KX274239        | KU743192        | NA        | KU743193        | NA              |
| <i>Laburnicola hawksworthii</i> <sup>T</sup>      | MFLUCC 13-0602        | KU743194        | KU743195        | NA        | KU743196        | NA              |
| <i>Laburnicola muriformis</i>                     | MFLUCC 14-0921        | KU743200        | KU743201        | NA        | KU743202        | NA              |
| <i>Laburnicola muriformis</i> <sup>T</sup>        | MFLUCC 16-0290        | KU743197        | KU743198        | NA        | KU743199        | KU743213        |
| <i>Letendreaa cordylinicola</i> <sup>T</sup>      | MFLUCC 11-0148        | NR154118        | NG059530        | NA        | NG068362        | NA              |
| <i>Letendreaa cordylinicola</i>                   | MFLUCC11-0150         | KM213996        | KM213999        | NA        | KM214002        | NA              |
| <i>Letendreaa padouk</i>                          | CBS 485.70            | NA              | AY849951        | NA        | GU296162        | NA              |
| <i>Montagnula aloes</i>                           | CPC 19671             | JX069863        | JX069847        | NA        | NA              | NA              |
| <i>Montagnula aloes</i> <sup>T</sup>              | CBS 132531            | NR111757        | NG042676        | NA        | NA              | NA              |
| <i>Montagnula appendiculata</i> <sup>T</sup>      | CBS 109027            | DQ435529        | AY772016        | NA        | NA              | NA              |
| <i>Montagnula bellevaliae</i> <sup>T</sup>        | MFLUCC 14-0924        | KT443906        | KT443902        | NA        | KT443904        | NA              |
| <i>Montagnula camporesii</i> <sup>T</sup>         | MFLUCC 16-1369        | MN401746        | NG070946        | NA        | NG068418        | MN397908        |
| <i>Montagnula chiangraiensis</i> <sup>T</sup>     | MFLUCC 17-1420        | NR168864        | NG068707        | NA        | NG070155        | NA              |
| <i>Montagnula chromolaenicola</i> <sup>T</sup>    | MFLUCC 17-1469        | NR168866        | NG070948        | NA        | NG070157        | MT235773        |
| <i>Montagnula chromolaenae</i> <sup>T</sup>       | MFLUCC 17-1435        | NR168865        | NG068708        | NA        | NG070156        | NA              |
| <i>Montagnula cirsii</i>                          | MFLUCC 13-0680        | KX274242        | KX274249        | NA        | KX274255        | KX284707        |
| <i>Montagnula cylindrospora</i> <sup>T</sup>      | UTHSC DI16-208        | LT796834        | LN907351        | NA        | NA              | LT797074        |
| <i>Montagnula donacina</i>                        | HFG07004              | MF967419        | MF183940        | NA        | NA              | NA              |
| <i>Montagnula donacina</i>                        | HVVV01                | KJ628375        | KJ628377        | NA        | KJ628376        | NA              |
| <i>Montagnula graminicola</i> <sup>T</sup>        | MFLUCC 13-0352        | KM658314        | KM658315        | NA        | KM658316        | NA              |
| <i>Montagnula krabiensis</i> <sup>T</sup>         | MFLUCC 16-0250        | NR168179        | NG068826        | NA        | NG068385        | MH412776        |
| <i>Montagnula puerensis</i> <sup>T</sup>          | KUMCC 20-0225         | MW567739        | MW575866        | NA        | MW575864        | MW573959        |
| <i>Montagnula puerensis</i>                       | KUMCC 20-0331         | MW567740        | MW575867        | NA        | MW575865        | MW573960        |
| <i>Montagnula saikhuensis</i>                     | MFLUCC 16-0315        | KU743209        | KU743210        | NA        | KU743211        | NA              |
| <i>Montagnula scabiosae</i> <sup>T</sup>          | MFLUCC 14-0954        | KT443907        | KT443903        | NA        | KT443905        | NA              |
| <b><i>Montagnula thailandica</i></b>              | <b>ZHKUCC 22-0206</b> | <b>OP297807</b> | <b>OP297777</b> | <b>NA</b> | <b>OP297791</b> | <b>OP321576</b> |
| <b><i>Montagnula thailandica</i></b>              | <b>ZHKUCC 22-0207</b> | <b>OP297808</b> | <b>OP297778</b> | <b>NA</b> | <b>OP297792</b> | <b>OP321577</b> |
| <i>Montagnula thailandica</i> <sup>T</sup>        | MFLUCC 17-1508        | MT214352        | NG070949        | NA        | NG070158        | MT235774        |
| <i>Neokalmusia brevispora</i>                     | KT 1466               | NA              | AB524600        | AB539099  | AB524459        | NA              |
| <i>Neokalmusia brevispora</i>                     | KT 2313               | NA              | AB524601        | AB539100  | AB524460        | NA              |
| <i>Neptunomyces aureus</i>                        | CMG12                 | MK912121        | NA              | NA        | NA              | MK948000        |
| <i>Neptunomyces aureus</i>                        | CMG13                 | MK912122        | NA              | NA        | NA              | MK948001        |
| <i>Neptunomyces aureus</i>                        | CMG14                 | MK912123        | NA              | NA        | NA              | MK948002        |
| <i>Paracamarosporium fagi</i>                     | CPC 24892             | KR611887        | KR611905        | NA        | NA              | NA              |
| <i>Paracamarosporium fagi</i>                     | CPC 24890             | KR611886        | KR611904        | NA        | NA              | NA              |
| <i>Paracamarosporium hawaiiense</i>               | CPC 12268             | DQ885896        | NA              | NA        | EU295656        | NA              |
| <i>Paracamarosporium hawaiiense</i> <sup>T</sup>  | CBS 120025            | JX496027        | JX496140        | NA        | EU295655        | NA              |

|                                                        |                       |                 |                 |                 |                 |                 |
|--------------------------------------------------------|-----------------------|-----------------|-----------------|-----------------|-----------------|-----------------|
| <i>Paracamarosporium leucadendri</i> <sup>†</sup>      | CBS:123027            | EU552106        | NA              | NA              | NA              | NA              |
| <i>Paracamarosporium mamanes</i> <sup>†</sup>          | CBS 120031            | DQ885900        | NA              | NA              | NA              | NA              |
| <i>Paracamarosporium psoraleae</i> <sup>†</sup>        | CPC 21632             | KF777143        | KF777199        | NA              | NA              | NA              |
| <i>Paracamarosporium tamaricis</i>                     | MFLUCC 15-0494        | KU900326        | KU900298        | NA              | NA              | NA              |
| <i>Paracamarosporium tamaricis</i>                     | MFLUCC 15-0495        | KU900327        | KU900299        | NA              | NA              | NA              |
| <i>Paraconiothyrium ajrekarii</i>                      | NFCCI 4810            | MT372906        | MT372905        | NA              | NA              | NA              |
| <i>Paraconiothyrium archidendri</i>                    | MFLUCC 17-2429        | MK347757        | MK347974        | NA              | MK347863        | MK360044        |
| <i>Paraconiothyrium archidendri</i>                    | CBS 168.77            | JX496049        | JX496162        | NA              | NA              | NA              |
| <i>Paraconiothyrium babiogorense</i> <sup>†</sup>      | CBS 128292            | MH864845        | MH876291        | NA              | NA              | NA              |
| <i>Paraconiothyrium camelliae</i>                      | NTUCC 18-096          | MT112293        | MT071269        | NA              | MT071220        | MT277330        |
| <i>Paraconiothyrium cyclothyrioides</i>                | CBS 972.95            | JX496119        | JX496232        | NA              | AY642524        | NA              |
| <i>Paraconiothyrium estuarinum</i>                     | CBS 109850            | JX496016        | JX496129        | NA              | AY642522        | NA              |
| <i>Paraconiothyrium fuscomaculans</i>                  | CBS 116.16            | MH854649        | MH866170        | NA              | EU754098        | NA              |
| <i>Paraconiothyrium fungicola</i> <sup>†</sup>         | CBS 113269            | JX496020        | JX496133        | NA              | AY642527        | NA              |
| <i>Paraconiothyrium hakeae</i>                         | CBS 142521            | KY979754        | KY979809        | KY979847        | NA              | NA              |
| <i>Paraconiothyrium iridis</i>                         | CBS:146036            | MT223827        | MT223919        | MT223695        | NA              | NA              |
| <i>Paraconiothyrium lini</i>                           | CBS 253.92            | NA              | GU238093        | NA              | GU238221        | NA              |
| <i>Paraconiothyrium lycopodium</i> <sup>†</sup>        | CBS 134705            | NA              | NG_058029       | NA              | NA              | NA              |
| <i>Paraconiothyrium maculiculis</i>                    | CBS 101461            | NA              | EU754200        | NA              | EU754101        | NA              |
| <i>Paraconiothyrium magnoliae</i>                      | MFLUCC 10-0278        | KJ939280        | KJ939283        | NA              | NA              | NA              |
| <i>Paraconiothyrium nelloi</i> <sup>†</sup>            | MFLU 14-0813          | KP711360        | KP711365        | NA              | KP711370        | NA              |
| <i>Paraconiothyrium polonense</i> <sup>†</sup>         | CBS:134153            | NA              | KF700360        | NA              | NA              | NA              |
| <i>Paraconiothyrium rosae</i> <sup>†</sup>             | MFLU 15-1115          | MG828932        | MG829041        | NA              | MG829147        | NA              |
| <i>Paraconiothyrium salinum</i> <sup>†</sup>           | CMG 49                | MN369540        | NA              | NA              | NA              | MN380481        |
| <i>Paraconiothyrium salinum</i>                        | CMG 50                | MN369541        | NA              | NA              | NA              | MN380482        |
| <i>Paraconiothyrium thysanolaenae</i> <sup>†</sup>     | MFLUCC 10-0550        | KP744453        | KP744496        | NA              | KP753959        | NA              |
| <i>Paraconiothyrium tiliae</i>                         | CBS 265.94            | NA              | EU754139        | NA              | EU754040        | NA              |
| <b><i>Paraconiothyrium yunnanensis</i><sup>†</sup></b> | <b>ZHKUCC 22-0196</b> | <b>OP297797</b> | <b>OP297767</b> | <b>OP321560</b> | <b>OP297781</b> | <b>OP321566</b> |
| <b><i>Paraconiothyrium yunnanensis</i></b>             | <b>ZHKUCC 22-0197</b> | <b>OP297798</b> | <b>OP297768</b> | <b>OP321561</b> | <b>OP297782</b> | <b>OP321567</b> |
| <i>Paramassariosphaeria anthostomoides</i>             | MFLU 16-0172          | KU743206        | KU743207        | NA              | KU743208        | NA              |
| <i>Paramassariosphaeria anthostomoides</i>             | CBS 615.86            | MH862005        | MH873693        | NA              | GU205246        | NA              |
| <i>Paraphaeosphaeria angularis</i> <sup>†</sup>        | CBS 167.70            | JX496047        | MH871317        | NA              | NA              | NA              |
| <i>Paraphaeosphaeria arecaeearum</i>                   | CBS 158.75            | JX496043        | JX496156        | NA              | NA              | NA              |
| <i>Paraphaeosphaeria camelliae</i>                     | NTUCC 18-095-1        | MT112291        | MT071267        | MT743278        | MT071218        | MT743269        |
| <i>Paraphaeosphaeria camelliae</i>                     | NTUCC 18-095-2        | MT112292        | MT071268        | MT743279        | MT071219        | MT743270        |
| <i>Paraphaeosphaeria michotii</i>                      | MFLUCC-13-0349        | KJ939279        | KJ939282        | NA              | KJ939285        | NA              |
| <i>Paraphaeosphaeria michotii</i>                      | CBS 652.86            | JX496103        | JX496216        | GU456351        | GQ387520        | NA              |
| <i>Paraphaeosphaeria minitans</i>                      | CBS 111750            | JX496017        | JX496130        | NA              | NA              | NA              |
| <i>Paraphaeosphaeria minitans</i>                      | CBS 861.71            | MH860382        | NA              | NA              | AY642526        | NA              |
| <i>Paraphaeosphaeria neglecta</i>                      | CBS 119637            | JX496025        | JX496138        | NA              | NA              | NA              |
| <i>Paraphaeosphaeria neglecta</i>                      | CBS 124078            | MH863348        | MH874872        | NA              | NA              | NA              |
| <i>Paraphaeosphaeria parmelliae</i>                    | CBS 131728            | KP170654        | KP170722        | NA              | NA              | NA              |
| <i>Paraphaeosphaeria pilleata</i>                      | CBS 102207            | JX496013        | JX496126        | NA              | NA              | NA              |
| <i>Paraphaeosphaeria rosae</i>                         | MFLUCC 17-2547        | MG828935        | MG829044        | NA              | MG829150        | NA              |
| <i>Paraphaeosphaeria roscicola</i>                     | MFLU 18-0108          | MG828938        | MG829047        | NA              | MG829153        | NA              |
| <i>Paraphaeosphaeria sardoa</i>                        | CBS 501.71            | MH860235        | MH872003        | NA              | NA              | NA              |
| <i>Paraphaeosphaeria</i> sp.                           | MFLUCC 15-0450        | KX965729        | KX954398        | NA              | KX986342        | NA              |
| <i>Paraphaeosphaeria</i> sp.                           | CBS 101464            | JX496012        | JX496125        | NA              | NA              | NA              |

|                                                        |                       |                 |                 |           |                 |                 |
|--------------------------------------------------------|-----------------------|-----------------|-----------------|-----------|-----------------|-----------------|
| <i>Paraphaeosphaeria spartii</i>                       | MFLU 14 C0810         | KP711357        | KP711362        | NA        | KP711367        | NA              |
| <i>Paraphaeosphaeria sporulosa</i>                     | CBS 132.26            | MH854865        | MH866362        | NA        | NA              | NA              |
| <i>Paraphaeosphaeria sporulosa</i>                     | CBS 391.86            | JX496082        | JX496195        | NA        | NA              | NA              |
| <i>Paraphaeosphaeria sporulosa</i>                     | CBS 105.76            | JX496014        | JX496127        | NA        | NA              | NA              |
| <i>Paraphaeosphaeria verruculosa</i>                   | CBS 263.85            | MH861879        | MH873567        | NA        | NA              | NA              |
| <i>Paraphaeosphaeria viciae</i>                        | MFLU 15-1231          | NR_158840       | KY397947        | NA        | KY397948        | NA              |
| <i>Paraphaeosphaeria viridescens</i> <sup>†</sup>      | CBS 854.73            | JX496085        | JX681076        | NA        | NA              | NA              |
| <i>Paraphaeosphaeria xanthorrhoeae</i> <sup>†</sup>    | CBS 142164            | KY979738        | KY979793        | KY979845  | NA              | NA              |
| <i>Periconia pseudodigitata</i> <sup>†</sup>           | KT1395                | LC014591        | AB807564        | NA        | AB797274        | AB808540        |
| <i>Periconia pseudodigitata</i>                        | KT1195A               | LC014590        | AB807563        | NA        | AB797273        | AB808539        |
| <i>Pseudocamarosporium africanum</i> <sup>†</sup>      | STE-U 6316            | EU295650        | NA              | NA        | EU295654        | NA              |
| <i>Pseudocamarosporium corni</i> <sup>†</sup>          | MFLUCC 13-0541        | KJ747048        | KJ813279        | NA        | KJ819946        | NA              |
| <i>Pseudocamarosporium cotinae</i> <sup>†</sup>        | MFLUCC 14-0624        | KP744460        | KP744505        | NA        | KP753964        | NA              |
| <i>Pseudocamarosporium loniceriae</i> <sup>†</sup>     | MFLUCC 13-0532        | KJ747047        | KJ813278        | NA        | KJ819947        | NA              |
| <i>Pseudocamarosporium propinquum</i>                  | MFLUCC 13-0544        | KJ747049        | KJ813280        | NA        | KJ819949        | NA              |
| <i>Pseudocoleophoma bauhiniae</i> <sup>†</sup>         | MFLUCC 17-2280        | MK347735        | MK347952        | NA        | MK347843        | MK360075        |
| <i>Pseudocoleophoma calamagrostidis</i> <sup>†</sup>   | KT3284                | LC014592        | LC014609        | NA        | LC014604        | LC014614        |
| <i>Pseudocoleophoma flavescens</i>                     | CBS 178.93            | NA              | GU238075        | NA        | GU238216        | NA              |
| <i>Pseudocoleophoma polygonicola</i> <sup>†</sup>      | KT731                 | AB809634        | AB807546        | NA        | AB797256        | AB808522        |
| <b><i>Pseudocoleophoma puerensis</i><sup>†</sup></b>   | <b>ZHKUCC 22-0204</b> | <b>OP297799</b> | <b>OP297769</b> | <b>NA</b> | <b>OP297783</b> | <b>OP321568</b> |
| <b><i>Pseudocoleophoma puerensis</i></b>               | <b>ZHKUCC 22-0205</b> | <b>OP297800</b> | <b>OP297770</b> | <b>NA</b> | <b>OP297784</b> | <b>OP321569</b> |
| <i>Pseudocoleophoma rusci</i> <sup>†</sup>             | MFLUCC 16-1444        | NR_170045       | NG_073840       | NA        | NG_070346       | NA              |
| <i>Pseudocoleophoma typhicola</i> <sup>†</sup>         | MFLUCC 16-0123        | KX576655        | KX576656        | NA        | NA              | NA              |
| <b><i>Pseudocoleophoma yunnanensis</i><sup>†</sup></b> | <b>ZHKUCC 22-0200</b> | <b>OP297795</b> | <b>OP297765</b> | <b>NA</b> | <b>OP297779</b> | <b>OP321564</b> |
| <b><i>Pseudocoleophoma yunnanensis</i></b>             | <b>ZHKUCC 22-0201</b> | <b>OP297796</b> | <b>OP297766</b> | <b>NA</b> | <b>OP297780</b> | <b>OP321565</b> |
| <i>Pseudocoleophoma zingiberacearum</i> <sup>†</sup>   | NCYUCC 19-0052        | MN615939        | MN616753        | NA        | NA              | MN629281        |
| <i>Pseudoconiothyrium broussonetiae</i>                | CBS 145036            | MK442618        | MK442554        | NA        | NA              | MK442709        |
| <i>Pseudodictyosporium elegans</i> <sup>†</sup>        | CBS 688.93            | DQ018099        | DQ018106        | NA        | DQ018084        | NA              |
| <i>Pseudodictyosporium indicum</i>                     | CBS 471.95            | DQ018097        | NA              | NA        | NA              | NA              |
| <i>Pseudodictyosporium wauense</i>                     | NBRC 30078            | DQ018098        | DQ018105        | NA        | DQ018083        | NA              |
| <i>Pseudodictyosporium thailandica</i> <sup>†</sup>    | MFLUCC 16-0029        | NR_154347       | NG_059688       | NA        | NG_063611       | KX259526        |
| <i>Spegazzinia deightonii</i>                          | MFLUCC 20-0002        | MN956768        | MN956772        | NA        | MN956770        | MN927133        |
| <i>Spegazzinia deightonii</i>                          | yone 212              | NA              | AB807582        | NA        | AB797292        | AB808558        |
| <i>Stagonospora paludosa</i>                           | CBS 135088            | NR155787        | KF251760        | NA        | NA              | NA              |
| <i>Stagonospora pseudocaricis</i>                      | CBS 135132            | KF251259        | KF251762        | NA        | NA              | NA              |
| <b><i>Xenocamarosporium acaciae</i></b>                | <b>ZHKUCC 22-0202</b> | <b>OP297805</b> | <b>OP297775</b> | <b>NA</b> | <b>OP297789</b> | <b>OP321574</b> |
| <b><i>Xenocamarosporium acaciae</i></b>                | <b>ZHKUCC 22-0203</b> | <b>OP297806</b> | <b>OP297776</b> | <b>NA</b> | <b>OP297790</b> | <b>OP321575</b> |
| <i>Xenocamarosporium acaciae</i> <sup>†</sup>          | CPC 24755             | KR476724        | KR476759        | NA        | NA              | NA              |
| <i>Xenocamarosporium acaciae</i>                       | C354                  | MK347766        | MK347983        | NA        | MK347873        | MK360093        |
